# Supplementary material
Source: Springer Nature journal article supplement (https://www.springermedizin.de/resource/supplementary/12889_2010_3230_MOESM5_ESM.pdf/9488436)

**Rural**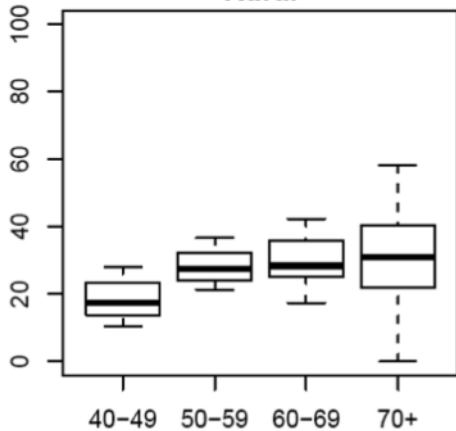**Urban**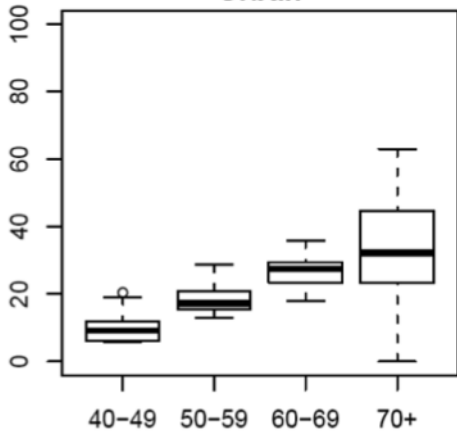**Age category**

Supplement: MOESM5 [file 9488436]
